# Supplementary material for: Bandgap tuning of photo Fenton-like Fe3O4/C catalyst through oxygen vacancies for advanced visible light photocatalysis
Source: Royal Society of Chemistry journal article supplement (doi:10.1039/d1ma00228g), 2021-01-01
Supplement: d1ma00228g1.pdf [file d1ma00228g1.pdf]

## Electronic Supplementary Information

### Band Gap Tuning of Photo Fenton-like Fe<sub>3</sub>O<sub>4</sub>/C Catalyst through Oxygen Vacancies for Advanced Visible Light Photocatalysis

Muthaimanoj Periyasamy,<sup>1,2</sup> Sumanta Sain,<sup>3</sup> Utsav Sengupta<sup>1</sup>, Moumi Mandal<sup>1</sup>, Sudipta Mukhopadhyay<sup>2\*</sup> and Arik Kar,<sup>1\*</sup>

<sup>1</sup>*Department of Chemistry, Indian Institute of Engineering Science and Technology, Shibpur, Howrah 711 103, India*

<sup>2</sup>*Department of Mining Engineering, Indian Institute of Engineering Science and Technology, Shibpur, Howrah 711 103, India*

<sup>3</sup>*School of Materials Sciences, Indian Association for the Cultivation of Science, Jadavpur, Kolkata 700 032, India*

\*Author to whom correspondence should be addressed; electronic mail: [akar@chem.iests.ac.in](mailto:akar@chem.iests.ac.in); Tel.: +0091 8334845357

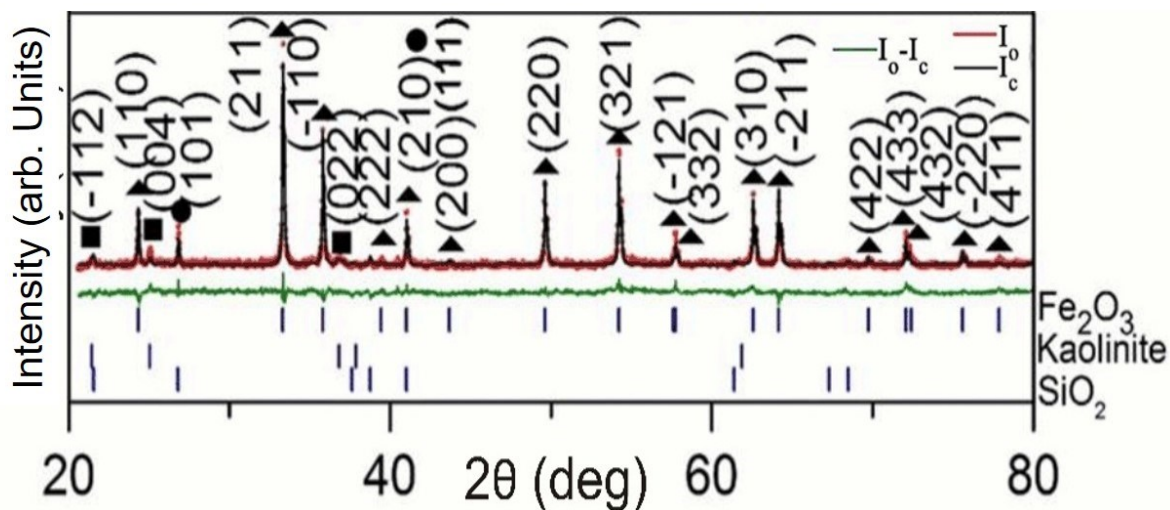

**Figure S1** Indexed experimental and simulated XRD patterns of IOTs (Red, black, and green patterns represent observed ( $I_O$ ), computed ( $I_C$ ), and residue ( $I_O - I_C$ ) data respectively. Blue markers (l) below each fitted pattern represent peak positions of the constituent phases. (▲), (■), and (●) represent  $Fe_2O_3$ , kaolinite and  $SiO_2$  phases respectively.

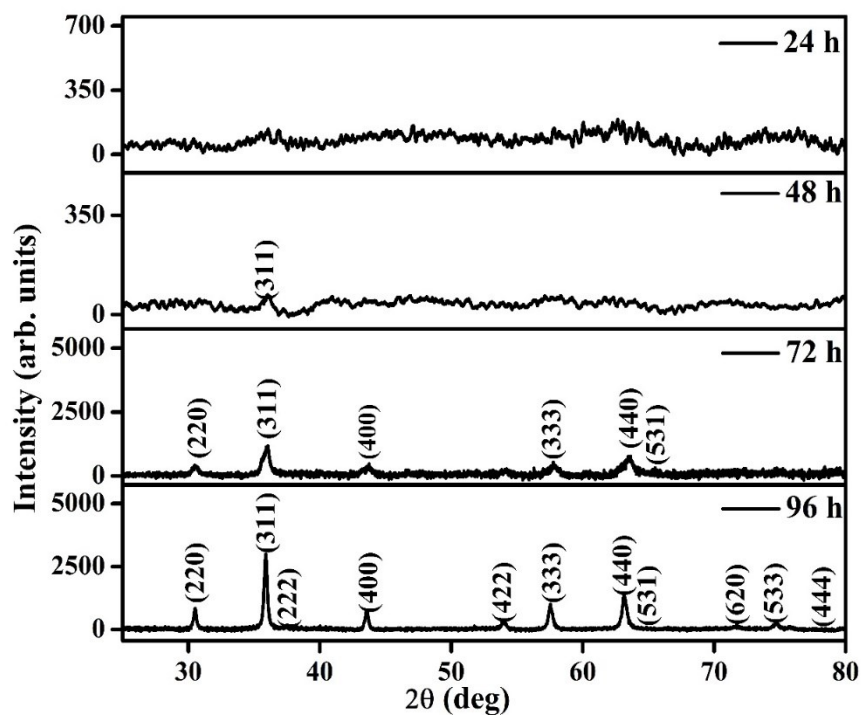

**Figure S2** XRD patterns of nanoparticles synthesized with different reaction times (24, 48, 72 and 96 h) at 160 °C.

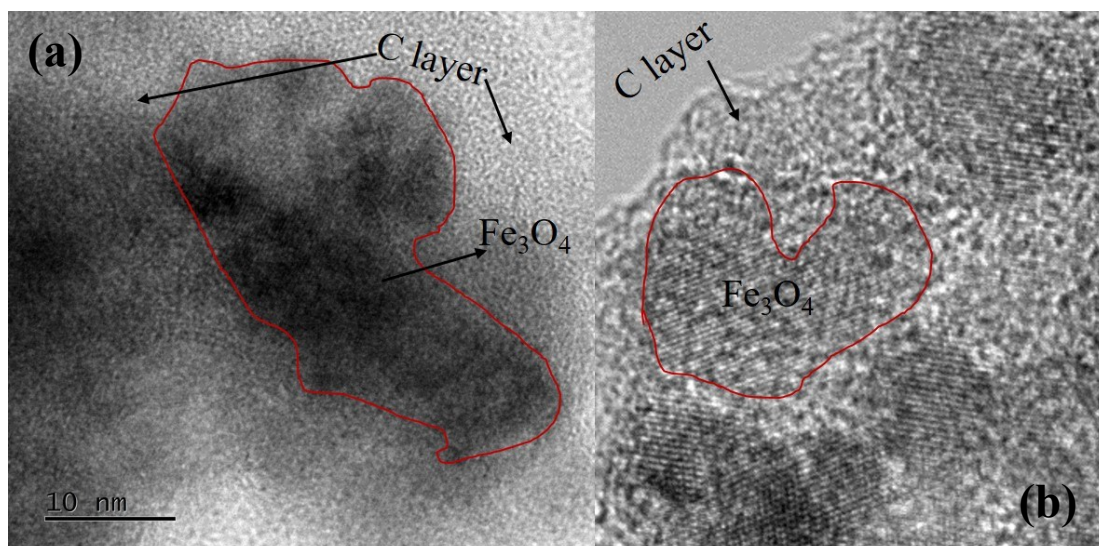

**Figure S3** HRTEM images of  $\text{Fe}_3\text{O}_4/\text{C}$  nanocomposites for (a)  $M_1$  and (b)  $M_2$ .

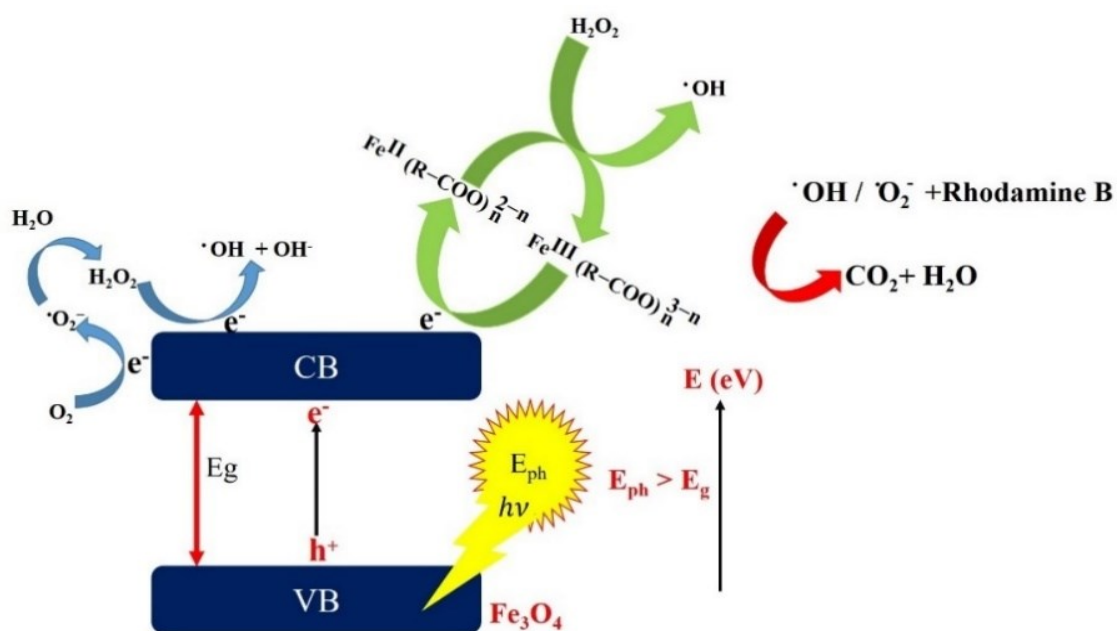

**Scheme S1** Schematic showing the photocatalytic decolorization of RhB dye by  $\text{Fe}_3\text{O}_4/\text{C}$  nanocomposites.

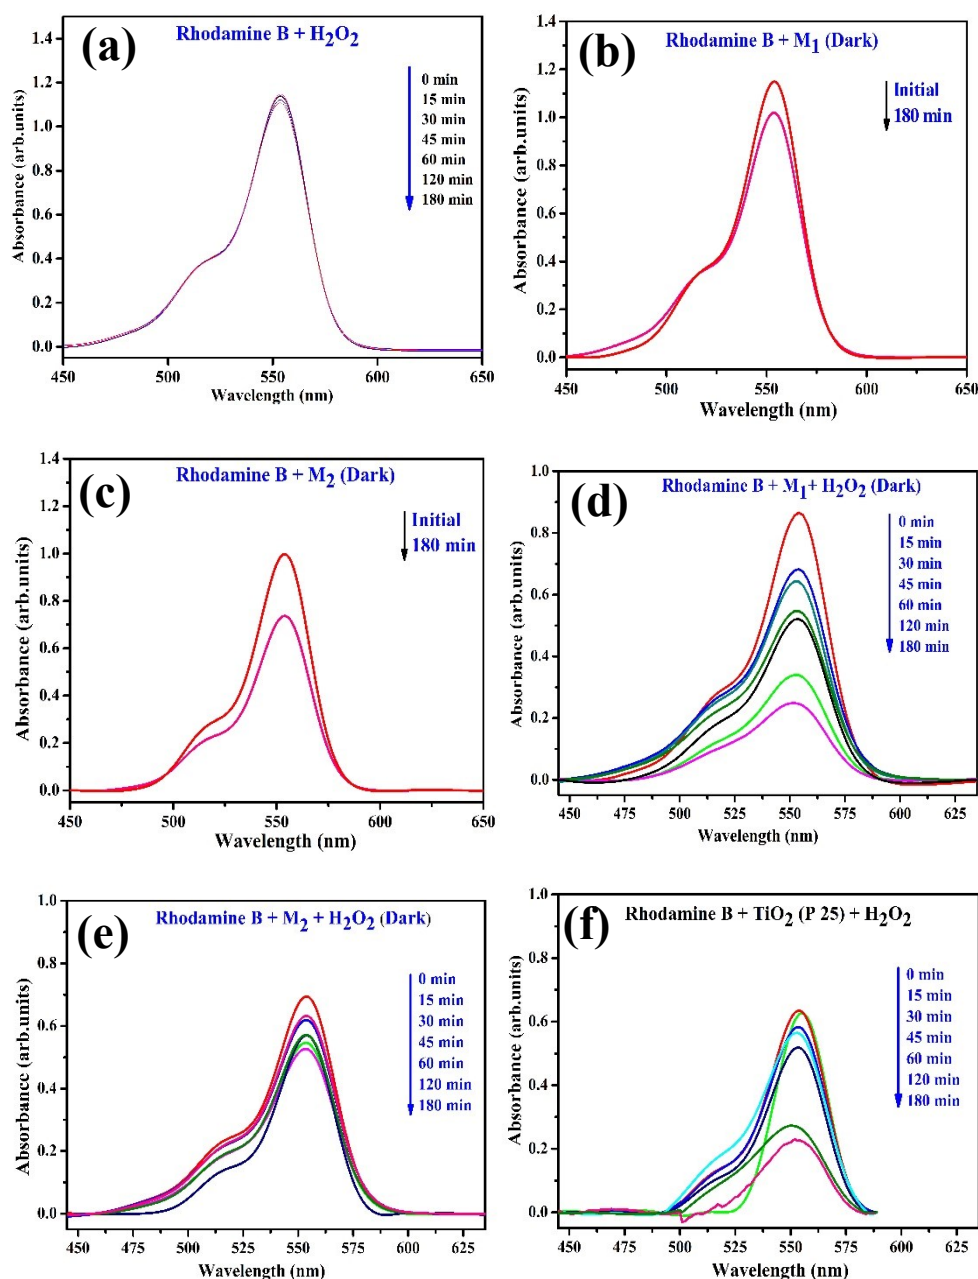

**Figure S4** Changes to  $\lambda_{\max}$  (555 nm) to RhB dye (50 ml of  $1.0 \times 10^{-5}$  M aqueous solution) upon treatment (a) with only  $\text{H}_2\text{O}_2$  (100  $\mu\text{l}$ ) under irradiation (b) with  $\text{M}_1$  (25.0 mg) without irradiation and in absence of  $\text{H}_2\text{O}_2$  (c) with  $\text{M}_2$  (25.0 mg) without irradiation and in absence of  $\text{H}_2\text{O}_2$  (d) with  $\text{M}_1$  (25.0 mg) without irradiation and in presence of  $\text{H}_2\text{O}_2$  (100  $\mu\text{l}$ ) (e) with  $\text{M}_2$  (25.0 mg) without irradiation and in presence of  $\text{H}_2\text{O}_2$  (100  $\mu\text{l}$ ); (f) Photolytically induced changes to  $\lambda_{\max}$  (555 nm) for RhB dye (50 ml of a  $1.0 \times 10^{-5}$  M aqueous solution) on treatment with  $\text{TiO}_2$  NPs (Degussa 25, 25.0 mg) and  $\text{H}_2\text{O}_2$  (100  $\mu\text{l}$ ) under visible light irradiation.
